# Supplementary material for: The Desaturase Gene Family is Crucially Required for Fatty Acid Metabolism and Survival of the Brown Planthopper, Nilaparvata lugens
Source: MDPI journal article supplement (doi:10.3390/ijms20061369), 2019-03-19
Supplement: s1 [file s1]

**The desaturase gene family is crucially required for fatty acid metabolism and survival of the brown planthopper, *Nilaparvata lugens***

Jia-mei Zeng, Wen-feng Ye, Ali Noman, Ricardo A.R. Machado and Yong-gen Lou \*

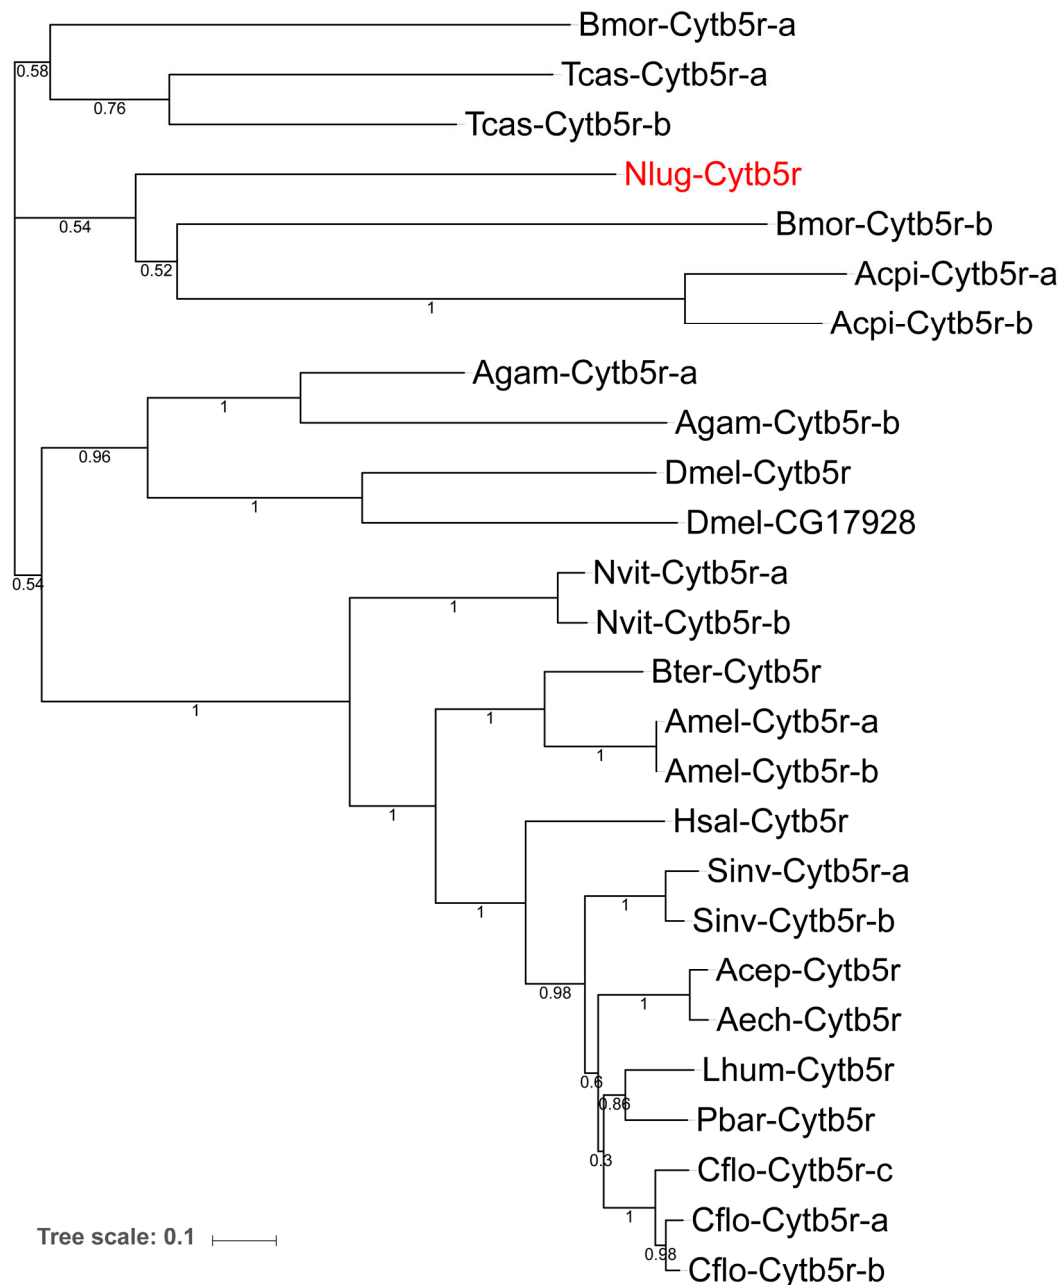

**Supplemental Figure S1.** Phylogenetic tree of insect cytochrome b5 fused desaturase genes (subfamily Cyt-b5-r) from 26 genes of 16 species.

The evolutionary history was inferred by using the Maximum Likelihood method model. The tree with the highest log likelihood (-13066.96) is shown. The proportion of trees in which the associated taxa clustered together is shown next to the branches. Initial tree(s) for the heuristic search were obtained automatically by applying Neighbor-Join and BioNJ algorithms to a matrix of pairwise distances estimated using a JTT model, and then selecting the topology with superior log likelihood value. A discrete Gamma distribution was used to model evolutionary rate differences among

sites (5 categories (+G, parameter = 1.6676)). The rate variation model allowed for some sites to be evolutionarily invariable ([+I], 8.62% sites). The tree is drawn to scale, with branch lengths measured in the number of substitutions per site. Bar represents 0.1 amino acid substitutions per sequence position. There were a total of 425 positions in the final dataset. Gene names follow the nomenclature based on the previously characterized *Cyt-b5-r* gene of *D. melanogaster*. Species are indicated by four-letter prefixes as follows: Aech = *Acromyrmex echinator*, Acep = *Atta cephalotes*, Cflo = *Camponotus floridanus*, Hsal = *Harpegnathos saltator*, Lhum = *Linepithema humile*, Pbar = *Pogonomyrmex barbatus*, Sinv = *Solenopsis invicta*, Acpi = *Acyrtosiphon pisum*, Amel = *Apis mellifera*, Agam = *Anopheles gambiae*, Bmor = *Bombyx mori*, Bter = *Bombus terrestris*, Dmel = *Drosophila melanogaster*, Nvit = *Nasonia vitripennis*, Tcas = *Tribolium castaneum*, and Nlug = *Nilaparvata lugens* (marked in red, accession number MH271225).

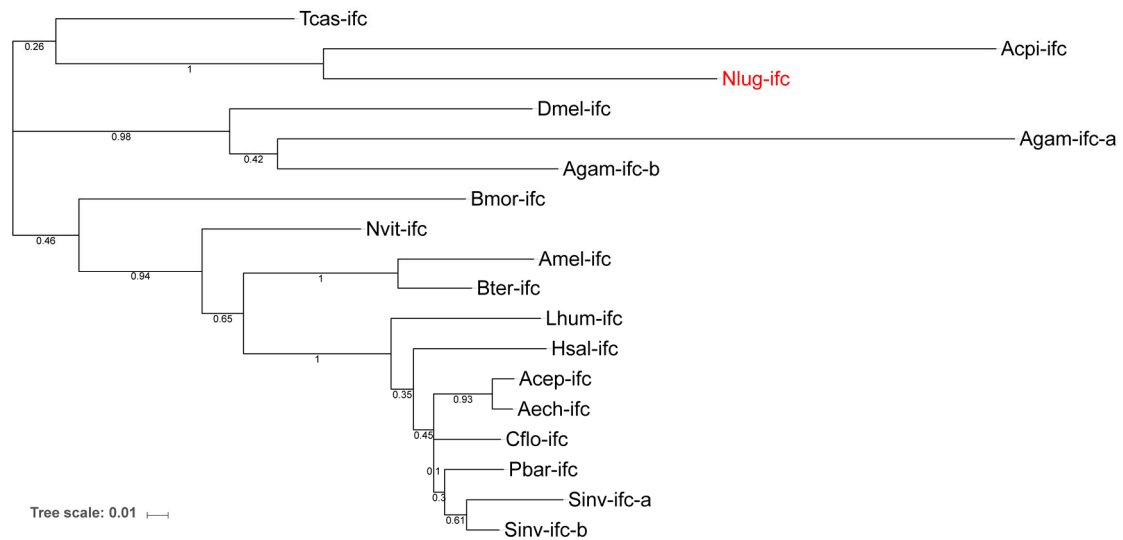

**Supplemental Figure S2.** Phylogenetic tree of Spingolipid Desaturase genes (Ifc subfamily) from 18 genes of 16 species.

The evolutionary history was inferred by using the Maximum Likelihood method model. The tree with the highest log likelihood (-3900.66) is shown. The proportion of trees in which the associated taxa clustered together is shown next to the branches. Initial tree(s) for the heuristic search were obtained automatically by applying Neighbor-Join and BioNJ algorithms to a matrix of pairwise distances estimated using a JTT model, and then selecting the topology with superior log likelihood value. A discrete Gamma distribution was used to model evolutionary rate differences among sites (5 categories (+G, parameter = 0.4771)). The tree is drawn to scale, with branch lengths measured in the number of substitutions per site. Bar represents 0.01 amino acid substitutions per sequence position. There were a total of 321 positions in the final dataset. Gene names follow the nomenclature based on the previously characterized ifc gene of *D. melanogaster*. Species are indicated by four-letter prefixes as follows: Aech = *Acromyrmex echinator*, Acep = *Atta cephalotes*, Cflo = *Camponotus floridanus*, Hsal = *Harpegnathos saltator*, Lhum = *Linepithema humile*, Pbar = *Pogonomyrmex barbatus*, Sinv = *Solenopsis invicta*, Acpi = *Acyrtosiphon pisum*, Amel = *Apis mellifera*, Agam = *Anopheles gambiae*, Bmor = *Bombyx mori*, Bter = *Bombus terrestris*, Dmel = *Drosophila melanogaster*, Nvit = *Nasonia vitripennis*, Tcas = *Tribolium castaneum*, and Nlug = *Nilaparvata lugens* (marked in red, accession number MH271230).

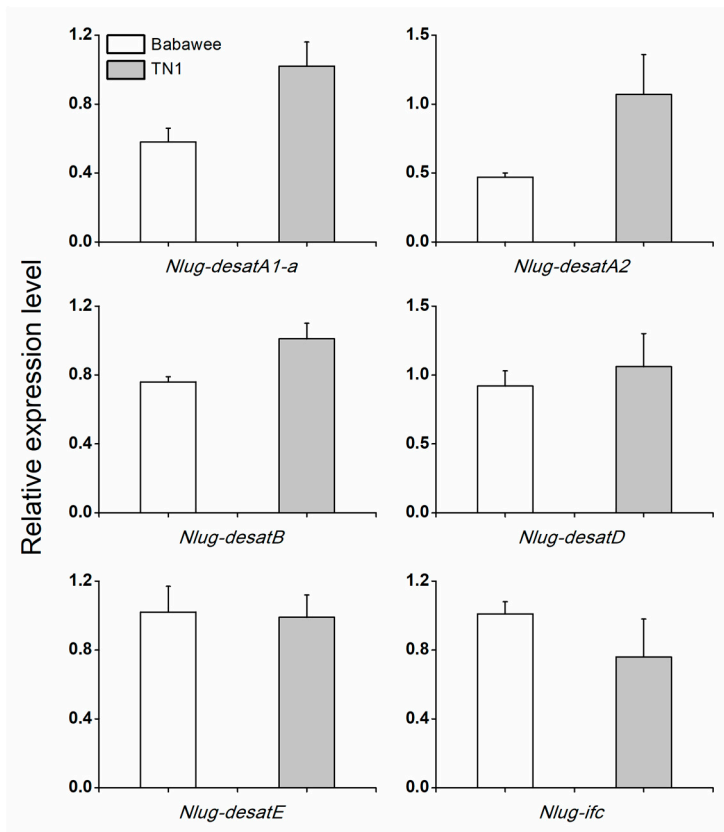

**Supplemental Figure S3.** Mean transcript levels (+SE,  $n = 3$ ) of 6 desaturase genes in BPH population reared on rice variety Babawee or TN1.

The results (threshold cycle values) of the qRT-PCR assays were normalized to the expression level of *RPS15* (ribosomal protein S15e, GenBank accession number: ACN79501.1). No significant difference between treatments is found (Student's  $t$  test).

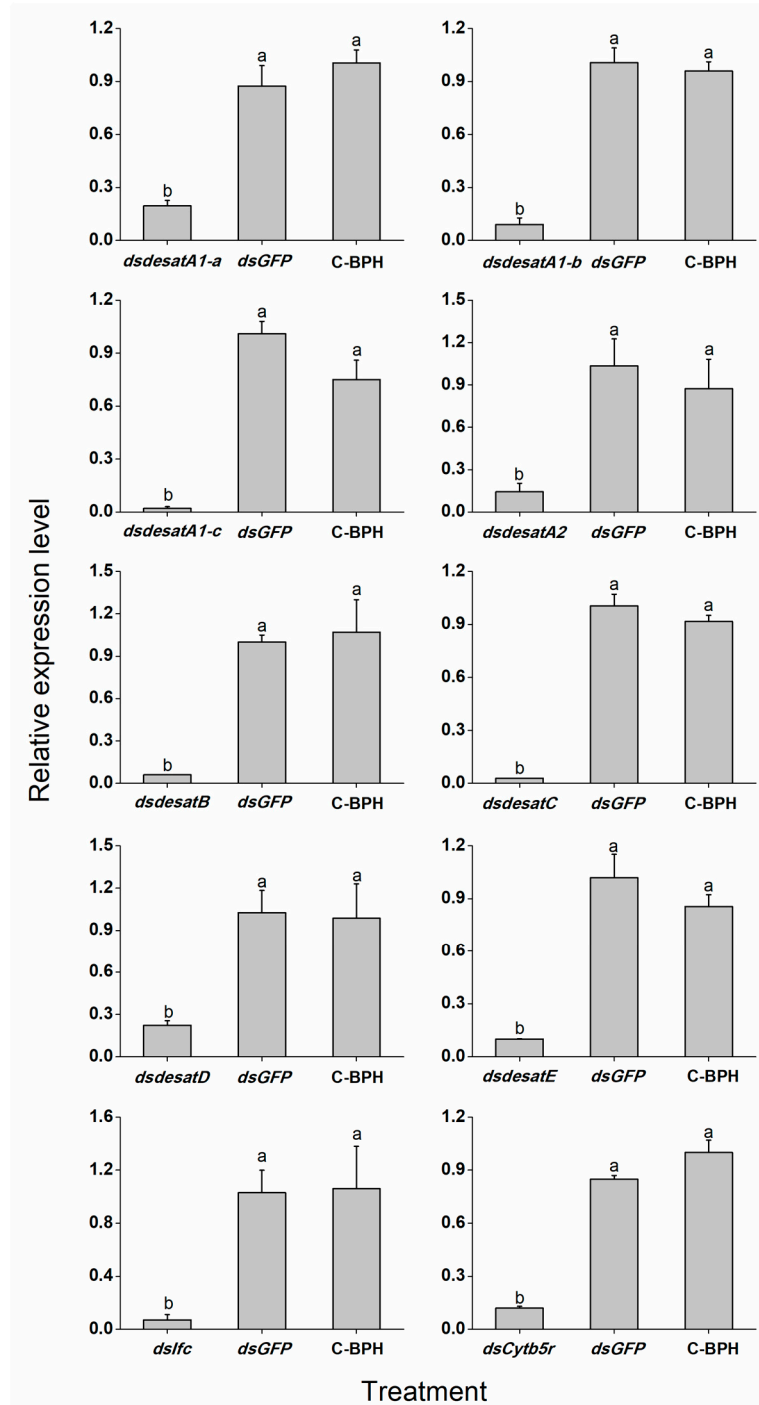

**Supplemental Figure S4.** The silencing efficiency of 10 *Nilaparvata lugens* desaturase genes by RNAi.

Mean transcript levels (+SE,  $n = 3$ ) of *Nlug-desats* in whole bodies on the third day after third-instar BPH nymphs had been singly injected with dsRNA of *Nlug-desats* or GFP (*dsGFP*), or kept non-injected (C-BPH). The results (threshold cycle values) of the qRT-PCR assays were normalized to the expression of *RPS15*. Letters indicate significant differences among different treatments ( $p < 0.05$ , Duncan's test).

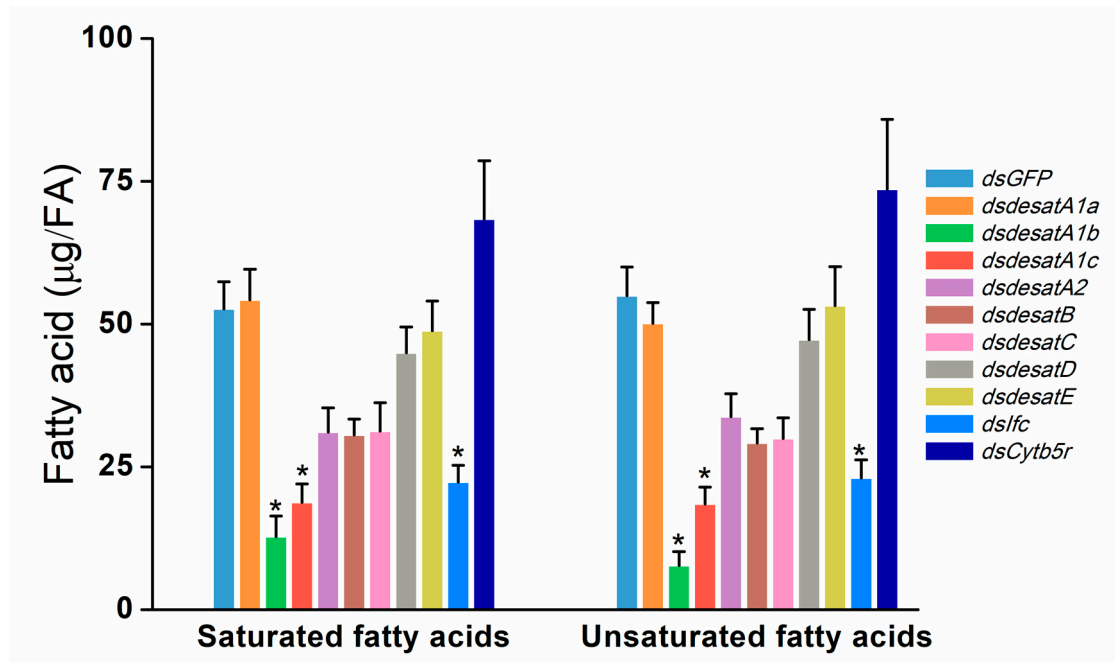

**Supplemental Figure S5.** The effect of single knockdown of *Nlug-desats* on the level of total saturated and unsaturated fatty acids.

Mean contents ( $\pm$ SE,  $n = 3$ ) of fatty acids in whole body of 1-d-old-female BPH adult (FA) at 3 days after injection of the dsRNA of 10 *N. lugens* desaturase genes or *GFP* (*dsGFP*). Differences in total fatty acid levels between the control group (*dsGFP*-BPH) and each treatment group were determined by Brown-Forsythe and Welch ANOVA followed by Dunnett's T3 multiple comparisons test. Asterisks indicate significant difference between *dsGFP* injection and each *dsdesat* injection treatments ( $P < 0.05$ ).

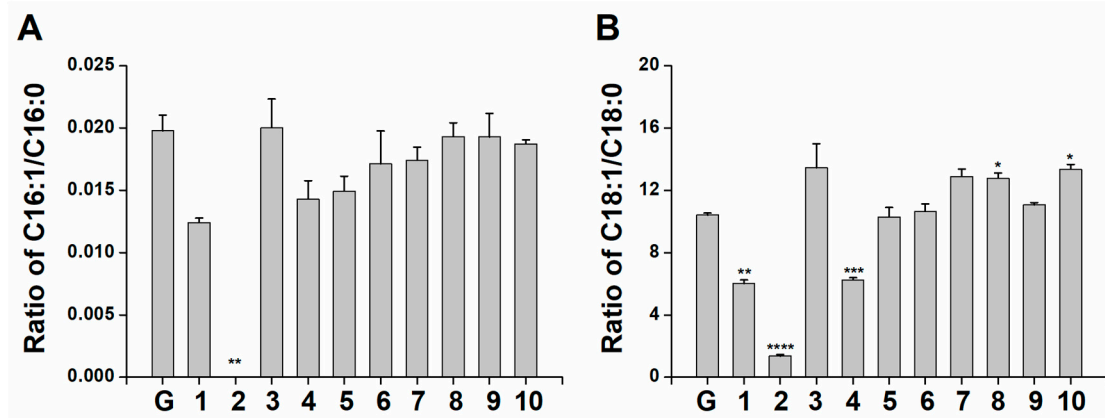

**Supplemental Figure S6.** The effect of single knockdown of *Nlug-desats* on the ratio of C16:1/C16:0 and C18:1/C18:0 in BPH.

The ratio of C16:1/C16:0 (**A**) and C18:1/C18:0 (**B**) in the whole body of 1-d-old-female BPH adult at 3 days after injection of the dsRNA of 10 *N.lugens* desaturase genes or *GFP* (*dsGFP*). G, dsGFP-BPH; dsRNA of 1 to 10: 1, *Nlug-desatA1-a*; 2, *Nlug-desatA1-b*; 3, *Nlug-desatA1-c*; 4, *Nlug-desatA2*; 5, *Nlug-desatB*; 6, *Nlug-desatC*; 7, *Nlug-desatD*; 8, *Nlug-desatE*; 9, *Nlug-Ifc*; 10, *Nlug-Cytb5r*. Differences between a control group (dsGFP-BPH) and each treatment group were determined by Brown-Forsythe and Welch ANOVA followed by Dunnett's T3 multiple comparisons test. Due to the undetectable levels of C12:0 and C16:1 in dsdesatA1-b-BPH, they were excluded from the multiple comparisons, and differences in the ratio of C16:1/C16:0 between dsdesatA1-b-BPH and dsGFP-BPH was analyzed by using t-test with Welch's correction. Asterisks indicate significant difference between dsGFP injection and each dsNIDESAT injection treatments (\*,  $P < 0.05$ ; \*\*,  $P < 0.01$ ; \*\*\*,  $P < 0.001$ ; \*\*\*\*,  $P < 0.0001$ ).



**Supplemental Table S2.** Differences in the transcript levels of single *Nlug-desat* gene among developmental stages.

| Gene ID               | Tamhane's T2 multiple comparisons test | Mean Diff. | 95.00% CI of diff.    | Summary | Adjusted P Value |
|-----------------------|----------------------------------------|------------|-----------------------|---------|------------------|
| <i>Nlug-desatA1-a</i> | egg vs. 2nd                            | -0.1433    | -0.2767 to -0.009825  | *       | 0.0398           |
|                       | egg vs. F2                             | -0.266     | -0.3512 to -0.1808    | ***     | 0.0006           |
|                       | egg vs. M1                             | -0.1844    | -0.3177 to -0.05111   | *       | 0.0175           |
|                       | egg vs. M3                             | -0.8941    | -1.722 to -0.06608    | *       | 0.0425           |
|                       | 1st vs. M3                             | -0.5611    | -0.9354 to -0.1867    | *       | 0.0106           |
|                       | 2nd vs. F1                             | 0.1873     | 0.02632 to 0.3483     | *       | 0.0292           |
|                       | 2nd vs. F2                             | -0.1228    | -0.2445 to -0.0009930 | *       | 0.0486           |
|                       | 2nd vs. M3                             | -0.7508    | -1.369 to -0.1323     | *       | 0.0313           |
|                       | 3rd vs. M3                             | -0.7674    | -1.153 to -0.3814     | **      | 0.0036           |
|                       | 4th vs. M3                             | -0.7594    | -1.136 to -0.3824     | **      | 0.0034           |
|                       | 5th vs. M3                             | -0.7106    | -1.179 to -0.2425     | *       | 0.0112           |
|                       | F1 vs. F2                              | -0.3101    | -0.5077 to -0.1124    | *       | 0.0129           |
|                       | F1 vs. M1                              | -0.2284    | -0.3894 to -0.06739   | *       | 0.0143           |
|                       | F1 vs. M3                              | -0.9381    | -1.420 to -0.4564     | **      | 0.0078           |
| <i>Nlug-desatA1-c</i> | F4 vs. M3                              | -0.6188    | -1.076 to -0.1614     | *       | 0.0169           |
|                       | M1 vs. M3                              | -0.7097    | -1.329 to -0.09084    | *       | 0.0359           |
|                       | egg vs. F1                             | -0.09667   | -0.1898 to -0.003566  | *       | 0.0445           |
|                       | 1st vs. M3                             | -0.5433    | -0.8930 to -0.1936    | *       | 0.0117           |
|                       | 2nd vs. M3                             | -0.5333    | -0.9393 to -0.1274    | *       | 0.0224           |
|                       | 5th vs. M3                             | -0.5233    | -0.8372 to -0.2095    | **      | 0.0071           |
| <i>Nlug-desatA2</i>   | F2 vs. M3                              | -0.4533    | -0.8030 to -0.1036    | *       | 0.0214           |
|                       | M1 vs. M3                              | -0.51      | -0.9034 to -0.1166    | *       | 0.0193           |
|                       | egg vs. 5th                            | 0.3009     | 0.05162 to 0.5501     | *       | 0.0249           |
|                       | egg vs. M3                             | -0.5514    | -0.8061 to -0.2968    | **      | 0.0025           |
|                       | 1st vs. M3                             | -0.9174    | -1.378 to -0.4571     | **      | 0.0096           |
|                       | 2nd vs. M3                             | -0.9144    | -1.597 to -0.2318     | *       | 0.0277           |
|                       | 3rd vs. M3                             | -0.9152    | -1.581 to -0.2497     | *       | 0.0261           |
|                       | 4th vs. M3                             | -0.9179    | -1.600 to -0.2362     | *       | 0.0274           |
|                       | 5th vs. F4                             | -0.2433    | -0.4586 to -0.02802   | *       | 0.0314           |
|                       | 5th vs. M3                             | -0.8523    | -1.091 to -0.6136     | ***     | 0.0004           |
| <i>Nlug-desatB</i>    | F1 vs. M3                              | -0.9205    | -1.654 to -0.1868     | *       | 0.032            |
|                       | F4 vs. M3                              | -0.609     | -0.8478 to -0.3701    | **      | 0.0014           |
| <i>Nlug-desatE</i>    | 2nd vs. F4                             | -0.8167    | -1.575 to -0.05861    | *       | 0.0395           |
| <i>Nlug-desatE</i>    | egg vs. 4th                            | -0.4206    | -0.6837 to -0.1575    | **      | 0.0087           |
|                       | 4th vs. F1                             | 0.4339     | 0.1408 to 0.7269      | *       | 0.0112           |
| <i>Nlug-Cytb5r</i>    | egg vs. M3                             | -0.4575    | -0.8461 to -0.06891   | *       | 0.0314           |
|                       | 1st vs. M3                             | -0.4969    | -0.7858 to -0.2080    | **      | 0.0065           |
|                       | F3 vs. M3                              | -0.3704    | -0.6609 to -0.08003   | *       | 0.0198           |

Differences in gene expression between different developmental stage were determined by Brown-Forsythe and Welch ANOVA followed by Tamhane's T2 multiple comparisons test. 1th to 5th, first- to fifth-instar larvae; F1-4, 1- to 4-d-old-female adult; M1-4, 1- to 4-d-old-male adult.

**Supplemental Table S4.** Differences in the transcript levels of single *Nlug-desat* gene among tissues.

| Gene ID               | Tamhane's T2 multiple comparisons test | Mean Diff. | 95.00% CI of diff.    | Summary | Adjusted P Value |
|-----------------------|----------------------------------------|------------|-----------------------|---------|------------------|
| <i>Nlug-desatA1-a</i> | Hd vs. Sg                              | -0.00992   | -0.01695 to -0.002892 | *       | 0.0164           |
|                       | Sg vs. Ov                              | 0.01612    | 0.007082 to 0.02516   | **      | 0.009            |
|                       | Mg vs. Ov                              | 0.02553    | 0.006420 to 0.04463   | *       | 0.0221           |
| <i>Nlug-desatA1-b</i> | Hd vs. Mg                              | 0.32       | 0.2190 to 0.4210      | **      | 0.0027           |
|                       | Hd vs. Ov                              | 0.4733     | 0.3447 to 0.6020      | ***     | 0.0007           |
| <i>Nlug-desatA1-c</i> | Hd vs. Sg                              | 0.1533     | 0.07983 to 0.2268     | **      | 0.0036           |
|                       | Hd vs. In                              | -0.5733    | -0.8733 to -0.2733    | *       | 0.0103           |
|                       | Hd vs. Mg                              | 0.1667     | 0.09077 to 0.2426     | **      | 0.0036           |
|                       | Hd vs. Fb                              | -0.66      | -1.174 to -0.1456     | *       | 0.0291           |
|                       | Hd vs. Ov                              | 0.23       | 0.1294 to 0.3306      | **      | 0.0027           |
|                       | Sg vs. In                              | -0.7267    | -1.068 to -0.3858     | **      | 0.0092           |
|                       | Sg vs. Fb                              | -0.8133    | -1.369 to -0.2576     | *       | 0.0226           |
|                       | In vs. Mg                              | 0.74       | 0.3814 to 1.099       | *       | 0.0104           |
|                       | In vs. Ov                              | 0.8033     | 0.5512 to 1.055       | **      | 0.0019           |
|                       | Mg vs. Fb                              | -0.8267    | -1.398 to -0.2552     | *       | 0.0234           |
| <i>Nlug-desatA2</i>   | Fb vs. Ov                              | 0.89       | 0.4378 to 1.342       | **      | 0.01             |
|                       | Hd vs. Sg                              | 0.08       | 0.02926 to 0.1307     | **      | 0.0091           |
|                       | Hd vs. In                              | -0.4033    | -0.7275 to -0.07917   | *       | 0.031            |
|                       | Sg vs. In                              | -0.4833    | -0.8075 to -0.1592    | *       | 0.0208           |
|                       | In vs. Mg                              | 0.45       | 0.08072 to 0.8193     | *       | 0.0335           |
|                       | In vs. Fb                              | 0.4        | 0.1759 to 0.6241      | **      | 0.0093           |
| <i>Nlug-desatE</i>    | Fb vs. Ov                              | -0.7667    | -1.523 to -0.01033    | *       | 0.0486           |
|                       | Hd vs. Fb                              | -0.2433    | -0.3703 to -0.1163    | **      | 0.0048           |
|                       | Sg vs. Fb                              | -0.2       | -0.3749 to -0.02514   | *       | 0.0359           |
|                       | Sg vs. Ov                              | 0.06333    | 0.01104 to 0.1156     | *       | 0.0279           |
|                       | Mg vs. Ov                              | 0.04667    | 0.01737 to 0.07596    | **      | 0.0087           |
| <i>Nlug-ifc</i>       | Fb vs. Ov                              | 0.2633     | 0.04234 to 0.4843     | *       | 0.0344           |
|                       | Hd vs. Fb                              | 0.3333     | 0.1756 to 0.4911      | **      | 0.0055           |
| <i>Nlug-Cytb5r</i>    | Hd vs. Ov                              | 0.22       | 0.1190 to 0.3210      | **      | 0.0071           |
|                       | Hd vs. Sg                              | 0.3133     | 0.02029 to 0.6064     | *       | 0.0421           |
|                       | Hd vs. Mg                              | 0.3833     | 0.2796 to 0.4870      | ***     | 0.0003           |
|                       | Hd vs. Fb                              | 0.39       | 0.06982 to 0.7102     | *       | 0.0303           |
| <i>Nlug-desatB</i>    | Hd vs. Ov                              | 0.29       | 0.1773 to 0.4027      | **      | 0.0033           |
|                       | Hd vs. Ov                              | -0.2333    | -0.4586 to -0.008103  | *       | 0.0408           |
|                       | Sg vs. In                              | -0.33      | -0.5552 to -0.1048    | **      | 0.0037           |
|                       | Sg vs. Mg                              | -0.33      | -0.5552 to -0.1048    | **      | 0.0037           |
|                       | Sg vs. Ov                              | -0.3567    | -0.5819 to -0.1314    | **      | 0.0019           |
| <i>Nlug-desatD</i>    | Fb vs. Ov                              | -0.2333    | -0.4586 to -0.008103  | *       | 0.0408           |
|                       | Hd vs. Sg                              | -0.4667    | -0.6686 to -0.2647    | ****    | <0.0001          |
|                       | Hd vs. In                              | -0.3433    | -0.5453 to -0.1414    | **      | 0.0011           |
|                       | Hd vs. Mg                              | -0.2967    | -0.4986 to -0.09472   | **      | 0.0036           |
|                       | Hd vs. Ov                              | -0.27      | -0.4719 to -0.06805   | **      | 0.0075           |
|                       | Sg vs. Fb                              | 0.3333     | 0.1314 to 0.5353      | **      | 0.0014           |
| <i>Nlug-desatD</i>    | In vs. Fb                              | 0.21       | 0.008050 to 0.4119    | *       | 0.0399           |

Tissue-specific gene expression patterns were analyzed by using Brown-Forsythe and Welch ANOVA followed by Tamhane's T2 multiple comparisons test. Mean transcript levels of *Nlug-desatB* and *Nlug-desatD* in different tissues of BPH were analyzed by using ordinary one-way ANOVA followed with Tukey's test.

**Supplemental Table S6.** Differences in specific fatty acid levels between a control group and each treatment group.

| Brown and Welch ANOVA tests followed by Dunnett's T3 multiple comparisons test |         |                  |            |                     |              |
|--------------------------------------------------------------------------------|---------|------------------|------------|---------------------|--------------|
| Dunnett's T3 multiple comparisons test                                         |         |                  |            |                     |              |
| C12:0                                                                          |         |                  |            |                     |              |
| Control vs. Treatment                                                          | Summary | Adjusted P Value | Mean Diff. | 95.00% CI of diff.  | Significant? |
| dsGFP vs. dsCytb5r                                                             | ns      | 0.7922           | -0.05514   | -0.1910 to 0.08069  | No           |
| dsGFP vs. dsdesatE                                                             | ns      | 0.9201           | 0.04387    | -0.09196 to 0.1797  | No           |
| dsGFP vs. dsdesatA1-a                                                          | ns      | 0.9994           | -0.01843   | -0.1543 to 0.1174   | No           |
| dsGFP vs. dsdesatD                                                             | ns      | 0.7143           | 0.06063    | -0.07521 to 0.1965  | No           |
| dsGFP vs. dsdesatB                                                             | ns      | 0.0623           | 0.1309     | -0.004980 to 0.2667 | No           |
| dsGFP vs. dsIfc                                                                | ns      | 0.505            | 0.07479    | -0.06105 to 0.2106  | No           |
| dsGFP vs. dsdesatA1-c                                                          | ns      | 0.0852           | 0.1237     | -0.01217 to 0.2595  | No           |
| dsGFP vs. dsdesatC                                                             | ns      | 0.7238           | 0.05998    | -0.07586 to 0.1958  | No           |
| dsGFP vs. dsdesatA1-b                                                          |         |                  |            |                     |              |
| dsGFP vs. dsdesatA2                                                            | ns      | 0.0606           | 0.1315     | -0.004323 to 0.2674 | No           |
| Dunnett's T3 multiple comparisons test                                         |         |                  |            |                     |              |
| C14:0                                                                          |         |                  |            |                     |              |
| Control vs. Treatment                                                          | Summary | Adjusted P Value | Mean Diff. | 95.00% CI of diff.  | Significant? |
| dsGFP vs. dsCytb5r                                                             | ns      | 0.6496           | -0.3649    | -1.563 to 0.8332    | No           |
| dsGFP vs. dsdesatE                                                             | ns      | 0.9305           | 0.1514     | -0.6210 to 0.9238   | No           |
| dsGFP vs. dsdesatA1-a                                                          | ns      | 0.9999           | -0.02595   | -1.090 to 1.038     | No           |
| dsGFP vs. dsdesatD                                                             | ns      | 0.85             | 0.1775     | -0.5804 to 0.9353   | No           |
| dsGFP vs. dsdesatB                                                             | ns      | 0.1139           | 0.5659     | -0.1936 to 1.325    | No           |
| dsGFP vs. dsIfc                                                                | *       | 0.0475           | 0.7841     | 0.01429 to 1.554    | Yes          |
| dsGFP vs. dsdesatA1-c                                                          | *       | 0.0378           | 0.8365     | 0.07577 to 1.597    | Yes          |
| dsGFP vs. dsdesatC                                                             | ns      | 0.2948           | 0.4677     | -0.4162 to 1.352    | No           |
| dsGFP vs. dsdesatA1-b                                                          | *       | 0.0167           | 1.113      | 0.3463 to 1.879     | Yes          |
| dsGFP vs. dsdesatA2                                                            | ns      | 0.075            | 0.6871     | -0.09316 to 1.467   | No           |
| Dunnett's T3 multiple comparisons test                                         |         |                  |            |                     |              |
| C16:0                                                                          |         |                  |            |                     |              |
| Control vs. Treatment                                                          | Summary | Adjusted P Value | Mean Diff. | 95.00% CI of diff.  | Significant? |
| dsGFP vs. dsCytb5r                                                             | ns      | 0.6684           | -15.28     | -73.85 to 43.30     | No           |
| dsGFP vs. dsdesatE                                                             | ns      | 0.9994           | 2.68       | -25.77 to 31.14     | No           |
| dsGFP vs. dsdesatA1-a                                                          | ns      | 0.9998           | 0.9501     | -26.72 to 28.62     | No           |
| dsGFP vs. dsdesatD                                                             | ns      | 0.8662           | 6.198      | -20.07 to 32.46     | No           |
| dsGFP vs. dsdesatB                                                             | ns      | 0.0992           | 19.59      | -5.491 to 44.68     | No           |
| dsGFP vs. dsIfc                                                                | *       | 0.0406           | 26.8       | 1.825 to 51.78      | Yes          |
| dsGFP vs. dsdesatA1-c                                                          | *       | 0.028            | 29.97      | 5.132 to 54.81      | Yes          |
| dsGFP vs. dsdesatC                                                             | ns      | 0.1598           | 18.87      | -8.845 to 46.59     | No           |
| dsGFP vs. dsdesatA1-b                                                          | *       | 0.0151           | 38.1       | 12.82 to 63.37      | Yes          |
| dsGFP vs. dsdesatA2                                                            | ns      | 0.0948           | 20.72      | -4.724 to 46.17     | No           |
| Dunnett's T3 multiple comparisons test                                         |         |                  |            |                     |              |
| C16:1                                                                          |         |                  |            |                     |              |
| Control vs. Treatment                                                          | Summary | Adjusted P Value | Mean Diff. | 95.00% CI of diff.  | Significant? |
| dsGFP vs. dsCytb5r                                                             | ns      | 0.8877           | -0.2295    | -1.303 to 0.8439    | No           |
| dsGFP vs. dsdesatE                                                             | ns      | 0.9995           | 0.07453    | -0.8261 to 0.9751   | No           |
| dsGFP vs. dsdesatA1-a                                                          | ns      | 0.3509           | 0.3662     | -0.5728 to 1.305    | No           |
| dsGFP vs. dsdesatD                                                             | ns      | 0.6314           | 0.2346     | -0.7415 to 1.211    | No           |
| dsGFP vs. dsdesatB                                                             | ns      | 0.1904           | 0.5343     | -0.5461 to 1.615    | No           |
| dsGFP vs. dsIfc                                                                | ns      | 0.1644           | 0.556      | -0.4151 to 1.527    | No           |
| dsGFP vs. dsdesatA1-c                                                          | ns      | 0.1425           | 0.6096     | -0.4066 to 1.626    | No           |
| dsGFP vs. dsdesatC                                                             | ns      | 0.2209           | 0.472      | -0.4457 to 1.390    | No           |
| dsGFP vs. dsdesatA1-b                                                          |         |                  |            |                     |              |
| dsGFP vs. dsdesatA2                                                            | ns      | 0.1678           | 0.5715     | -0.4989 to 1.642    | No           |

| Dunnett's T3 multiple comparisons test |         |                  | C18:0      |                    |              |
|----------------------------------------|---------|------------------|------------|--------------------|--------------|
| Control vs. Treatment                  | Summary | Adjusted P Value | Mean Diff. | 95.00% CI of diff. | Significant? |
| dsGFP vs. dsCytb5r                     | ns      | >0.9999          | -0.04414   | -3.894 to 3.806    | No           |
| dsGFP vs. dsdesatE                     | ns      | 0.6114           | 0.9451     | -1.781 to 3.671    | No           |
| dsGFP vs. dsdesatA1-a                  | ns      | 0.2123           | -2.476     | -6.903 to 1.950    | No           |
| dsGFP vs. dsdesatD                     | ns      | 0.4005           | 1.254      | -1.515 to 4.022    | No           |
| dsGFP vs. dsdesatB                     | ns      | 0.1053           | 1.787      | -0.6065 to 4.181   | No           |
| dsGFP vs. dsIfc                        | *       | 0.0345           | 2.638      | 0.3191 to 4.957    | Yes          |
| dsGFP vs. dsdesatA1-c                  | *       | 0.0231           | 2.929      | 0.6030 to 5.255    | Yes          |
| dsGFP vs. dsdesatC                     | ns      | 0.0961           | 1.99       | -0.4572 to 4.437   | No           |
| dsGFP vs. dsdesatA1-b                  | ns      | 0.9997           | 0.2955     | -6.998 to 7.589    | No           |
| dsGFP vs. dsdesatA2                    | ns      | >0.9999          | 0.03953    | -2.910 to 2.989    | No           |
| Dunnett's T3 multiple comparisons test |         |                  | C18:1      |                    |              |
| Control vs. Treatment                  | Summary | Adjusted P Value | Mean Diff. | 95.00% CI of diff. | Significant? |
| dsGFP vs. dsCytb5r                     | ns      | 0.7478           | -13.08     | -70.79 to 44.63    | No           |
| dsGFP vs. dsdesatE                     | ns      | 0.9996           | 2.317      | -28.58 to 33.22    | No           |
| dsGFP vs. dsdesatA1-a                  | ns      | 0.9739           | 3.713      | -19.83 to 27.26    | No           |
| dsGFP vs. dsdesatD                     | ns      | 0.8796           | 6.163      | -20.92 to 33.24    | No           |
| dsGFP vs. dsdesatB                     | ns      | 0.0922           | 18.86      | -4.732 to 42.45    | No           |
| dsGFP vs. dsIfc                        | *       | 0.0348           | 26.41      | 3.053 to 49.77     | Yes          |
| dsGFP vs. dsdesatA1-c                  | *       | 0.0298           | 27.42      | 4.224 to 50.62     | Yes          |
| dsGFP vs. dsdesatC                     | ns      | 0.075            | 20.45      | -2.870 to 43.78    | No           |
| dsGFP vs. dsdesatA1-b                  | *       | 0.014            | 38.06      | 13.96 to 62.16     | Yes          |
| dsGFP vs. dsdesatA2                    | ns      | 0.1166           | 17.67      | -5.725 to 41.07    | No           |
| Dunnett's T3 multiple comparisons test |         |                  | C18:2      |                    |              |
| Control vs. Treatment                  | Summary | Adjusted P Value | Mean Diff. | 95.00% CI of diff. | Significant? |
| dsGFP vs. dsCytb5r                     | ns      | 0.5735           | -5.35      | -25.37 to 14.67    | No           |
| dsGFP vs. dsdesatE                     | ns      | 0.9996           | -0.6449    | -10.10 to 8.806    | No           |
| dsGFP vs. dsdesatA1-a                  | ns      | 0.9891           | 0.7422     | -4.817 to 6.301    | No           |
| dsGFP vs. dsdesatD                     | ns      | 0.8882           | 1.301      | -4.504 to 7.107    | No           |
| dsGFP vs. dsdesatB                     | ns      | 0.0537           | 6.37       | -0.2141 to 12.95   | No           |
| dsGFP vs. dsIfc                        | ns      | 0.0718           | 4.916      | -0.6131 to 10.45   | No           |
| dsGFP vs. dsdesatA1-c                  | *       | 0.0239           | 8.392      | 2.211 to 14.57     | Yes          |
| dsGFP vs. dsdesatC                     | ns      | 0.118            | 4.072      | -1.502 to 9.645    | No           |
| dsGFP vs. dsdesatA1-b                  | *       | 0.0227           | 8.235      | 2.215 to 14.25     | Yes          |
| dsGFP vs. dsdesatA2                    | ns      | 0.333            | 2.905      | -2.889 to 8.699    | No           |

Differences in specific fatty acid levels between a control group (dsGFP-BPH) and each treatment group were determined by Brown-Forsythe and Welch ANOVA followed by Dunnett's T3 multiple comparisons test. "ns", no significance.

**Supplemental Table S7.** Primers used for cloning, qRT-PCR and T7 adapted primers used for downstream dsRNA synthesis steps.

| Gene                  | Description | Forward primer (5'---3')  | Reverse primer (5'---3') | Product sizes (bp) |
|-----------------------|-------------|---------------------------|--------------------------|--------------------|
| <i>Nlug-Cytb5r</i>    | Cloning     | TGTCGTGCAACTAACAGGGA      | CTGCTACACCATTCGTGGGA     | 1513               |
| <i>Nlug-desatE</i>    |             | TTGCATCCATCCATACGGCA      | GTCCAAGAAACCGGGCCTTA     | 1709               |
| <i>Nlug-desatA1-a</i> |             | TGTTTAGTCCGAGGACAAGGAA    | ATGCAAGTAGACAGGTGGGC     | 1673               |
| <i>Nlug-desatD</i>    |             | GCCTGGTGTGTCACAAGGAT      | AGCATTCAGTGTACGACACTTTG  | 1056               |
| <i>Nlug-desatB</i>    |             | CAGAATGGGCGCTCAGCTA       | GTGACAACCGTTCACCGTCA     | 1000               |
| <i>Nlug-ifc</i>       |             | TGCAGTATTGTGTTACCGGCT     | TGCACTTGGCTGGCAAAAAT     | 1225               |
| <i>Nlug-desatA2-a</i> |             | TGAAGTGCCCGCCTTAGGTA      | CGCCTCAGATGTTGAAGGGT     | 1237               |
| <i>Nlug-desatC</i>    |             | AGTGCTAAGTCGAGTGACAGC     | TGTTGCATTGTAGCTTCGACA    | 1175               |
| <i>Nlug-desatA1-b</i> |             | GCAACCCCTCGTTCTCAGTT      | AGCAAAATGAGTTGCGCGAT     | 1342               |
| <i>Nlug-desatA2-b</i> |             | CCAATCGCAAAAGACGGCAT      | CGATCAATTTCTTGTGCGCCG    | 1280               |
| <i>Nlug-Cytb5r</i>    | qRT-PCR     | CAGCTCACCATCATCCAGAC      | ACCACGGGAATGTCTTCTTC     | 123                |
| <i>Nlug-desatE</i>    |             | GAGCATATTGCTGCCGATAA      | AATGGTGGCTGAGTTGATGA     | 133                |
| <i>Nlug-desatA1-a</i> |             | CTTACCACCAGATTCATCG       | AGATCTTGATCGTCCCATCC     | 150                |
| <i>Nlug-desatD</i>    |             | TGCACAAACAACAATCACCA      | CACCGCCATGTACGAATAAT     | 112                |
| <i>Nlug-desatB</i>    |             | GCCTACGACCTCAAGAGTCC      | AGGTGATCGTCCCAGGTAAG     | 93                 |
| <i>Nlug-ifc</i>       |             | TATTATGGCTGCCTCAATGC      | CTGAAGCAATTTACGAACC      | 112                |
| <i>Nlug-desatA2-a</i> |             | AAATACCAGGAGACCGATGC      | CGGAGATGTCGATACCCTTT     | 127                |
| <i>Nlug-desatC</i>    |             | CGACCTCAAAGAAGCCAAGCC     | TAGGTGCGTCCTTCGATCCC     | 131                |
| <i>Nlug-desatA1-b</i> |             | ACATGTGCTCAGGATTTGGA      | GGGAAATTTGCCTTGTAGGA     | 76                 |
| <i>Nlug-desatA2-b</i> |             | CTGGAGCAGAAGTCATCCCT      | CGCTGTTGTTGTTGTTGTTG     | 103                |
| <i>RPS11</i>          |             | CCGATCGTGTGGCGTTGAAGGG    | ATGGCCGACATTCTTCCAGGTCC  | 159                |
| <i>RPS15</i>          |             | TAAAAATGGCAGACGAAGAGCCCAA | TTCCACGGTTGAAACGTCTGCG   | 150                |

| Gene                  | Description     | Forward primer (5'---3')                            | Reverse primer (5'---3')                            | Product sizes (bp) |
|-----------------------|-----------------|-----------------------------------------------------|-----------------------------------------------------|--------------------|
| <i>Nlug-Cytb5r</i>    |                 | GGATCCTAATACGACTCACTATAGG<br>ACGAGTCGTACACCTGAAC    | GGATCCTAATACGACTCACTATAGG<br>ATGAAACCGGCCGTGTAGTT   | 315                |
| <i>Nlug-desatE</i>    |                 | GGATCCTAATACGACTCACTATAGG<br>ACTTGTTTGTGTCAGGGATCGG | GGATCCTAATACGACTCACTATAGG<br>CGGCAGCAATATGCTCACTA   | 312                |
| <i>Nlug-desatA1-a</i> |                 | GGATCCTAATACGACTCACTATAGG<br>GGTTAATGATCCGCAAGCAT   | GGATCCTAATACGACTCACTATAGG<br>GCTGCACTGTTTACAAGCCA   | 303                |
| <i>Nlug-desatD</i>    |                 | GGATCCTAATACGACTCACTATAGG<br>GCTCATCGTCTATGGTCGCA   | GGATCCTAATACGACTCACTATAGG<br>GGACATGTGATCGCTTTGC    | 305                |
| <i>Nlug-desatB</i>    |                 | GGATCCTAATACGACTCACTATAGG<br>CAAATTGCCACTGCAGCTAA   | GGATCCTAATACGACTCACTATAGG<br>CCGGGAATATGAAGCAAAAA   | 352                |
| <i>Nlug-ifc</i>       | dsRNA synthesis | GGATCCTAATACGACTCACTATAGG<br>TATTCATCCTGTGGCTGGGC   | GGATCCTAATACGACTCACTATAGG<br>TCTCTTGATGCGGGCGTATG   | 330                |
| <i>Nlug-desatA2-a</i> |                 | GGATCCTAATACGACTCACTATAGG<br>GACAGCTGTTCGAGGAGGAC   | GGATCCTAATACGACTCACTATAGG<br>AGTCTGTGAACTCCCGCTGT   | 282                |
| <i>Nlug-desatC</i>    |                 | GGATCCTAATACGACTCACTATAGG<br>AGGTTGGCACAACCTCCATC   | GGATCCTAATACGACTCACTATAGG<br>CATTCTGCACCTTTCTGCAA   | 269                |
| <i>Nlug-desatA1-b</i> |                 | GGATCCTAATACGACTCACTATAGG<br>CAAGAAGCCCGAACAGAAAC   | GGATCCTAATACGACTCACTATAGG<br>TGCACTCTGTGATCTCTGGC   | 356                |
| <i>Nlug-desatA2-b</i> |                 | GGATCCTAATACGACTCACTATAGG<br>GTGGAGAAATGTTGCTGCCT   | GGATCCTAATACGACTCACTATAGG<br>CGGTGTCTGTGAACTTGTGG   | 337                |
| <i>GFP</i>            |                 | GGATCCTAATACGACTCACTATAGG<br>AAGGGCGAGGAGCTGTTACCG  | GGATCCTAATACGACTCACTATAGG<br>CAGCAGGACCATGTGATCGCGC | 707                |
